# Supplementary material
Source: MDPI journal article supplement (https://www.mdpi.com/2624-8549/3/3/61)
Supplement: s1 [file s1]

## Supplementary Material

### Unveiling the Intramolecular Ionic Diels-Alder Reactions within the Molecular Electron Density Theory

Luis R. Domingo<sup>1\*</sup> María José Aurell,<sup>1</sup> and Mar Ríos-Gutiérrez<sup>1</sup>

<sup>1</sup>*Department of Organic Chemistry, University of Valencia, Dr. Moliner 50, E-46100*

*Burjassot, Valencia, Spain, E-mail: domingo@utopia.uv.es*

#### Index

- S2** Estimation of the electrophilic  $\omega$  indices from the LUMO energies.
- S5** Figure with the ELF basin attractor positions of the experimental dieniminium **12e**.
- S6** Figure with the  $\omega$ B97XD/6-311G(d,p) geometries of the TSs involved in the IIDA reaction of dieniminium **16**.
- S7** Table with the B3LYP/6-311G(d,p) thermodynamic data of the stationary points involved in the N-DA reaction of butadiene **1** and ethylene **2**, and in the IMDA reaction of (E)-deca-1,3,9-triene **10**.
- S7** Table with the total energies and the thermodynamic data of the stationary points involved in the I-DA reaction of butadiene **1** with ethaniminium **18**.
- S8** Table with the  $\omega$ B97XD/6-311G(d,p) total energies in ethanol of the stationary points involved in the IIDA reactions of dieniminiums **12** and **16**.
- S8** Table with the thermodynamic data of the stationary points involved in the in the IIDA reaction of dieniminium **12**.
- S9** Table with the ELF valence basin populations and distances of the N1-C6 and C2-C3 forming bonds of the structures of the IRC associated to the IIDA reaction of dieniminium **16**, defining the nine phases of the BET.

*Estimation of the electrophilic  $\omega$  indices from the LUMO energies.*

As was commented on in Section 3.1.2, the extended conformations of dieniminiums **12** and **16** present anomalous values of the electrophilicity  $\omega$  indices when they are compared with those of the fold conformations (see Table S1). A similarly behavior is found at the extended conformation of dieniminium **29**, which was used in the synthesis of ( $\pm$ )-lupinine via a IIDA reaction (see reference [16] in the manuscript). As shows Table S1, the extended conformation **29e** presents also a high electrophilicity  $\omega$  value, 17.42 eV, when it is compared with that of the fold conformation **29f**, 10.71 eV.

**Table S1.** HOMO and LUMO energies, the electronic chemical potential,  $\mu$ , chemical hardness,  $\eta$ , electrophilicity,  $\omega$ , and nucleophilicity,  $N$ , indices, of dieniminiums **12**, **16** and **29**, and the estimated electrophilicity  $\omega_{\text{LUMO}}$  index, in eV, of the extended conformations of dieniminiums **12e**, **16e** and **29e**.

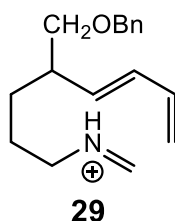

|            | $\epsilon_{\text{HOMO}}$ | $\epsilon_{\text{LUMO}}$ | $\mu$ | $\eta$ | $\omega$ | $N$   | $\omega_{\text{LUMO}}$ |
|------------|--------------------------|--------------------------|-------|--------|----------|-------|------------------------|
| <b>12e</b> | -7.90                    | -6.88                    | -7.39 | 1.02   | 26.72    | 1.22  | 7.64                   |
| <b>12f</b> |                          |                          | -7.85 | 3.68   | 8.36     | -0.57 |                        |
| <b>16e</b> | -8.23                    | -7.07                    | -7.65 | 1.16   | 25.19    | 0.89  | 7.91                   |
| <b>16f</b> |                          |                          | -8.23 | 3.76   | 9.01     | -0.99 |                        |
| <b>29e</b> | -8.21                    | -6.63                    | -7.42 | 1.58   | 17.42    | 0.91  | 7.30                   |
| <b>29f</b> | -8.73                    | -6.15                    | -7.44 | 2.59   | 10.71    | 0.39  |                        |

An analysis of the dependence of the electrophilicity  $\omega$  indices of the HOMO and LUMO energies, allows establishing a very good polynomic correlation between the electrophilicity  $\omega$  indices of ten substituted ethylenes given in Figure 1 with the LUMO energies,  $\epsilon_{\text{LUMO}}$ , of these species,  $R^2 = 0.99$  (see Table S2 and Figure S1).

The polynomic equation S1 obtained from this analysis allows establishing an estimated electrophilicity  $\omega_{\text{LUMO}}$  index from the LUMO energies,  $\epsilon_{\text{LUMO}}$ .

$$\omega_{\text{LUMO}} = 0.059 * \epsilon_{\text{LUMO}}^2 - 0.5803 * \epsilon_{\text{LUMO}} + 0.8589 \quad (\text{S1})$$

The last column of Table S2 shows the estimated electrophilicity  $\omega_{\text{LUMO}}$  indices for the ten substituted ethylenes. As shows Figure S2, a very good linear correlation between the estimated electrophilicity  $\omega_{\text{LUMO}}$  indices and the electrophilicity  $\omega$  indices for this series can be found,  $R^2=0.99$ .

**Table S1.** B3LYP/6-31G(d) HOMO and LUMO energies, the electronic chemical potential,  $\mu$ , chemical hardness,  $\eta$ , electrophilicity,  $\omega$ , and nucleophilicity,  $N$ , indices, and the estimated electrophilicity  $\omega_{\text{LUMO}}$  index, in eV, of ten electrophilic ethylenes shown in Figure 1.

| $\epsilon_{\text{HOMO}}$ | $\epsilon_{\text{LUMO}}$ | $\mu$  | $\eta$ | $\omega$ | $N$   | $\omega_{\text{LUMO}}$ |
|--------------------------|--------------------------|--------|--------|----------|-------|------------------------|
| -14.96                   | -7.39                    | -11.18 | 7.57   | 8.25     | -5.84 | 8.37                   |
| -7.88                    | -4.03                    | -5.96  | 3.85   | 4.61     | 1.24  | 4.16                   |
| -6.14                    | -2.97                    | -4.55  | 3.17   | 3.28     | 2.99  | 3.10                   |
| -7.20                    | -3.07                    | -5.14  | 4.13   | 3.20     | 1.92  | 3.20                   |
| -8.47                    | -2.82                    | -5.64  | 5.65   | 2.82     | 0.65  | 2.97                   |
| -7.00                    | -1.77                    | -4.38  | 5.23   | 1.84     | 2.12  | 2.07                   |
| -7.87                    | -1.53                    | -4.70  | 6.34   | 1.74     | 1.25  | 1.89                   |
| -6.03                    | -0.83                    | -3.43  | 5.20   | 1.13     | 3.09  | 1.38                   |
| -7.26                    | 0.51                     | -3.37  | 7.77   | 0.73     | 1.86  | 0.58                   |
| -5.95                    | 1.04                     | -2.45  | 6.99   | 0.43     | 3.18  | 0.32                   |

By using the equation S1, the electrophilicity  $\omega_{\text{LUMO}}$  indices for the extended conformations of dieniminiums **12**, **16** and **29** can be estimated (see the last columns of Table S1). The estimated electrophilicity  $\omega_{\text{LUMO}}$  indices for these dieniminiums, 7.64 (**12e**), 7.91 (**16e**), and 7.30 (**29e**) eV, are found in reasonable agreement with the values computed for the fold conformations of these dieniminiums: 8.36 (**12f**), 9.91 (**16f**) and 10.71 (**29f**) eV.

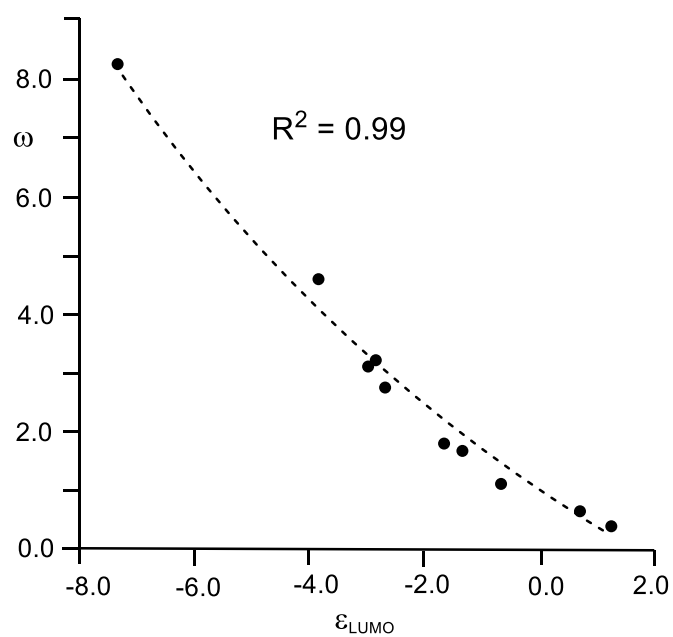

**Figure S1.** Plot of the electrophilic  $\omega$  index, in eV, vs the LUMO energy,  $\epsilon_{\text{LUMO}}$  in eV, for the ten electrophilic ethylenes given in Table S1.

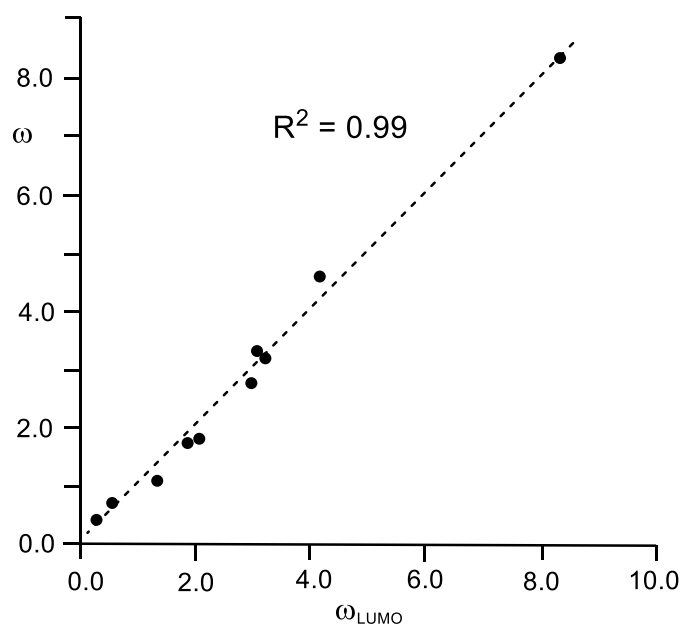

**Figure S2.** Plot of the electrophilic  $\omega$  index, in eV, vs electrophilic  $\omega_{\text{LUMO}}$  index, in eV, computed with equation S1 for the ten electrophilic ethylenes given in Table S1.

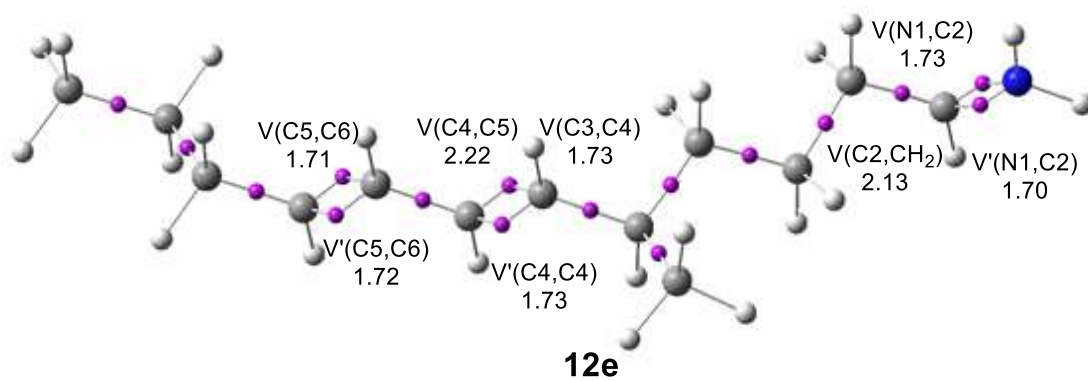

**Figure S3.** ELF basin attractor positions together with the most relevant valence basin populations, in average number of electrons  $e$ , of experimental dieniminium **12e**.

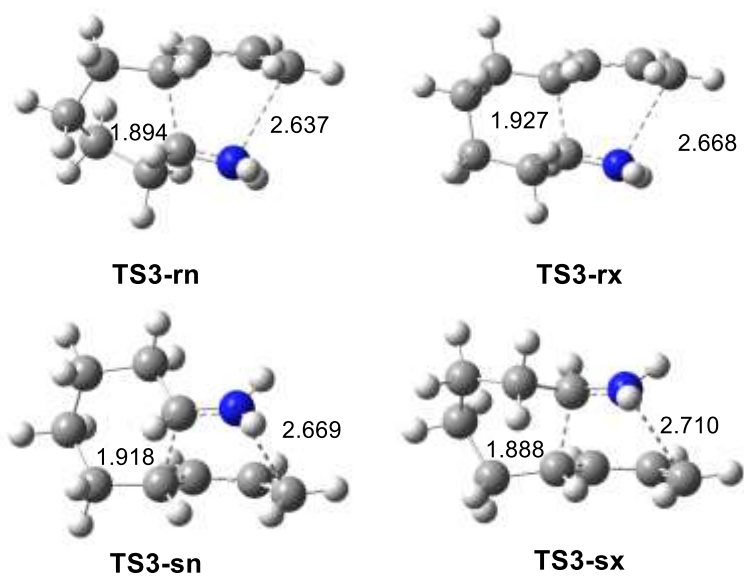

**Figure S4.**  $\omega$ B97XD/6-311G(d,p) geometries of the TSs involved in the IIDA reaction of dieniminium **16**. The C–C and C–N distances are given in Angstroms.

**Table S3.** B3LYP/6-311G(d,p) Total enthalpies (H, in a.u.), entropies (S, in cal·mol<sup>-1</sup>·K) and Gibbs free energies (G, in a.u.), computed at 165 °C and 1 atm, of the stationary points involved in the N-DA reaction of butadiene **1** and ethylene **2**, and in the IMDA reaction of (E)-deca-1,3,9-triene **10**.

|                 | H           | S     | G           |
|-----------------|-------------|-------|-------------|
| <b>1</b>        | -155.943414 | 75.5  | -155.996132 |
| <b>2</b>        | -78.556580  | 59.5  | -78.598142  |
| <b>TS-inter</b> | -234.458973 | 90.3  | -234.521992 |
| <b>3</b>        | -234.545362 | 82.6  | -234.603062 |
| <b>10</b>       | -390.496085 | 132.4 | -390.588538 |
| <b>TS-intra</b> | -390.449161 | 113.0 | -390.528056 |
| <b>11</b>       | -390.542008 | 108.2 | -390.617586 |

**Table S4.** ωB97XD/6-311G(d,p) Total energies (E, in a.u.), enthalpies (H, in a.u.), entropies (S, in cal/mol.K) and Gibbs free energies (G, in a.u.), computed at 75 °C and 1 atm in ethanol, of the stationary points involved in the I-DA reaction of butadiene **1** with ethaniminium **18**.

|              | E           | H           | S     | G           |
|--------------|-------------|-------------|-------|-------------|
| <b>1</b>     | -155.971411 | -155.878939 | 70.8  | -155.918212 |
| <b>18</b>    | -134.402131 | -134.312646 | 65.7  | -134.349095 |
| <b>MC</b>    | -290.380710 | -290.196469 | 110.5 | -290.257768 |
| <b>TS1-n</b> | -290.360639 | -290.176819 | 90.4  | -290.226977 |
| <b>TS1-x</b> | -290.359141 | -290.175431 | 91.6  | -290.226255 |
| <b>22</b>    | -290.439419 | -290.249367 | 84.8  | -290.296437 |
| <b>23</b>    | -290.430824 | -290.240908 | 86.5  | -290.288935 |

**Table S5.**  $\omega$ B97XD/6-311G(d,p) Total energies (E, in a.u.) in ethanol of the stationary points involved in the IIDA reactions of dieniminiums **12** and **16**.

|               |             |               |             |
|---------------|-------------|---------------|-------------|
| <b>12e</b>    | -564.374165 | <b>16e</b>    | -407.118939 |
| <b>12f</b>    | -564.374636 | <b>16f</b>    | -407.117322 |
| <b>TS2-rn</b> | -564.354065 | <b>TS3-rn</b> | -407.090745 |
| <b>TS2-rx</b> | -564.360566 | <b>TS3-rx</b> | -407.097228 |
| <b>TS2-sn</b> | -564.360462 | <b>TS3-sn</b> | -407.097319 |
| <b>TS2-sx</b> | -564.352466 | <b>TS3-sx</b> | -407.090046 |
| <b>24</b>     | -564.414443 | <b>26</b>     | -407.162072 |
| <b>13</b>     | -564.424182 | <b>17</b>     | -407.167646 |
| <b>14</b>     | -564.422875 | <b>27</b>     | -407.166973 |
| <b>25</b>     | -564.414727 | <b>28</b>     | -407.157982 |

**Table S6.**  $\omega$ B97XD/6-311G(d,p) Total enthalpies (H, in a.u.), entropies (S, in cal/mol.K) and Gibbs free energies (G, in a.u.), computed at 75 °C and 1 atm in ethanol, of the stationary points involved in the IIDA reaction of dieniminium **12**.

|               | H           | S     | G           |
|---------------|-------------|-------|-------------|
| <b>12e</b>    | -563.999312 | 149.5 | -564.082268 |
| <b>12f</b>    | -564.001063 | 138.4 | -564.077825 |
| <b>TS2-rn</b> | -563.980199 | 133.3 | -564.054144 |
| <b>TS2-rx</b> | -563.987237 | 135.2 | -564.062250 |
| <b>TS2-sn</b> | -563.986749 | 132.9 | -564.060483 |
| <b>TS2-sx</b> | -563.978536 | 135.0 | -564.053420 |
| <b>24</b>     | -564.034738 | 125.7 | -564.104504 |
| <b>13</b>     | -564.044771 | 126.4 | -564.114922 |
| <b>14</b>     | -564.043684 | 128.6 | -564.115045 |
| <b>25</b>     | -564.034904 | 126.7 | -564.105216 |



**Table S7.** ELF valence basin populations and distances of the N1-C6 and C2-C3 forming bonds of the structures of the IRC associated to the IIDA reaction of dieniminium **16**, defining the nine phases of the BET. Distances are given in angstroms, Å, and electron populations in average number of electrons, e.

| Structures    | S0       | S1        | S2         | S3        | S4       | S5        | S6         | S7          | S8        | S9    |
|---------------|----------|-----------|------------|-----------|----------|-----------|------------|-------------|-----------|-------|
| <i>Phases</i> | <i>I</i> | <i>II</i> | <i>III</i> | <i>IV</i> | <i>V</i> | <i>VI</i> | <i>VII</i> | <i>VIII</i> | <i>IX</i> |       |
| d(N1-C6)      | 3.145    | 3.077     | 2.866      | 2.863     | 2.849    | 2.840     | 2.822      | 2.115       | 1.997     | 1.522 |
| d(C2-C3)      | 2.804    | 2.723     | 2.132      | 2.123     | 2.081    | 2.055     | 2.005      | 1.580       | 1.568     | 1.534 |
| V(N1,C2)      | 3.46     | 3.47      | 3.03       | 3.02      | 2.92     | 2.86      | 2.74       | 1.78        | 1.78      | 1.77  |
| V(C3,C4)      | 1.56     | 1.55      | 1.49       | 1.49      | 3.11     | 3.09      | 3.06       | 2.35        | 2.26      | 1.73  |
| V'(C3,C4)     | 1.73     | 1.75      | 1.66       | 1.65      |          |           |            |             |           |       |
| V(C4,C5)      | 2.23     | 2.24      | 2.37       | 2.37      | 2.39     | 2.40      | 2.42       | 3.17        | 1.45      | 1.67  |
| V'(C4,C5)     |          |           |            |           |          |           |            |             | 1.81      | 1.78  |
| V(C5,C6)      | 1.57     | 3.29      | 3.12       | 3.12      | 3.12     | 2.80      | 2.71       | 2.12        | 2.09      | 2.02  |
| V'(C5,C6)     | 1.76     |           |            |           |          |           |            |             |           |       |
| V(N1)         |          |           | 0.56       | 0.57      | 0.68     | 0.74      | 0.88       |             |           |       |
| V(C2)         |          |           |            | 0.11      | 0.17     | 0.19      |            |             |           |       |
| V(C3)         |          |           |            |           |          | 0.32      |            |             |           |       |
| V(C2,C3)      |          |           |            |           |          |           | 0.67       | 1.78        | 1.82      | 1.92  |
| V(N1,C6)      |          |           |            |           |          |           |            | 1.59        | 1.59      | 1.73  |
